# Supplementary material for: OrthoFinder: solving fundamental biases in whole genome comparisons dramatically improves orthogroup inference accuracy
Source: PubMed Central journal article supplement (PMC4531804; doi:10.1186/s13059-015-0721-2), 2015-08-06

# Pairwise all-vs-all BLAST score transforms for Homo sapiens vs each other species

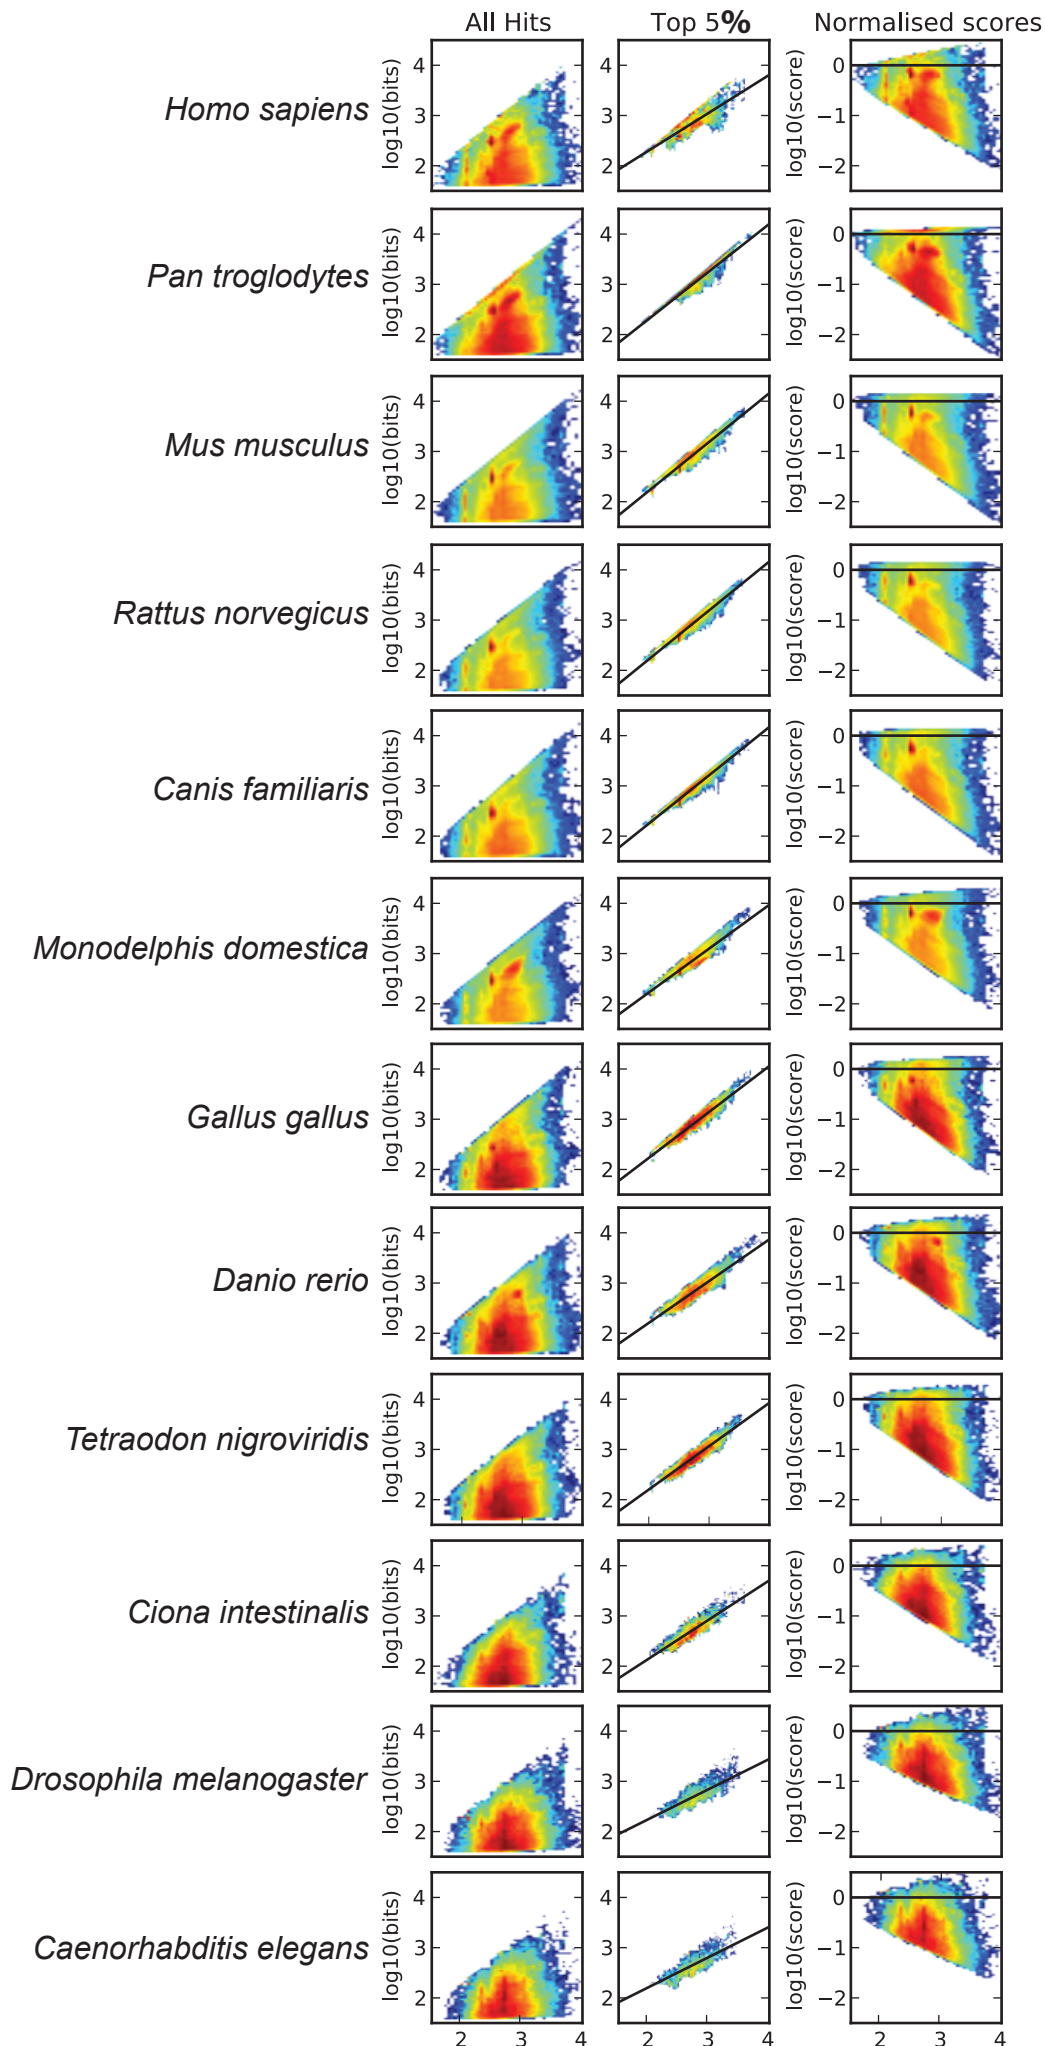

All fitted lines prior to normalisation

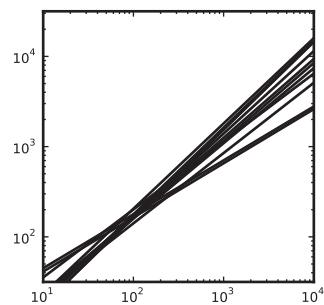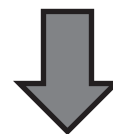

All fitted lines post normalisation

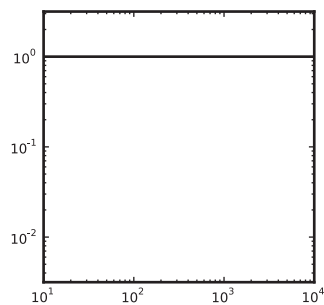

Supplement: 13059_2015_721_MOESM2_ESM.pdf [file 13059_2015_721_MOESM2_ESM.pdf]
