# Supplementary material for: OrthoFinder: solving fundamental biases in whole genome comparisons dramatically improves orthogroup inference accuracy
Source: PubMed Central journal article supplement (PMC4531804; doi:10.1186/s13059-015-0721-2), 2015-08-06

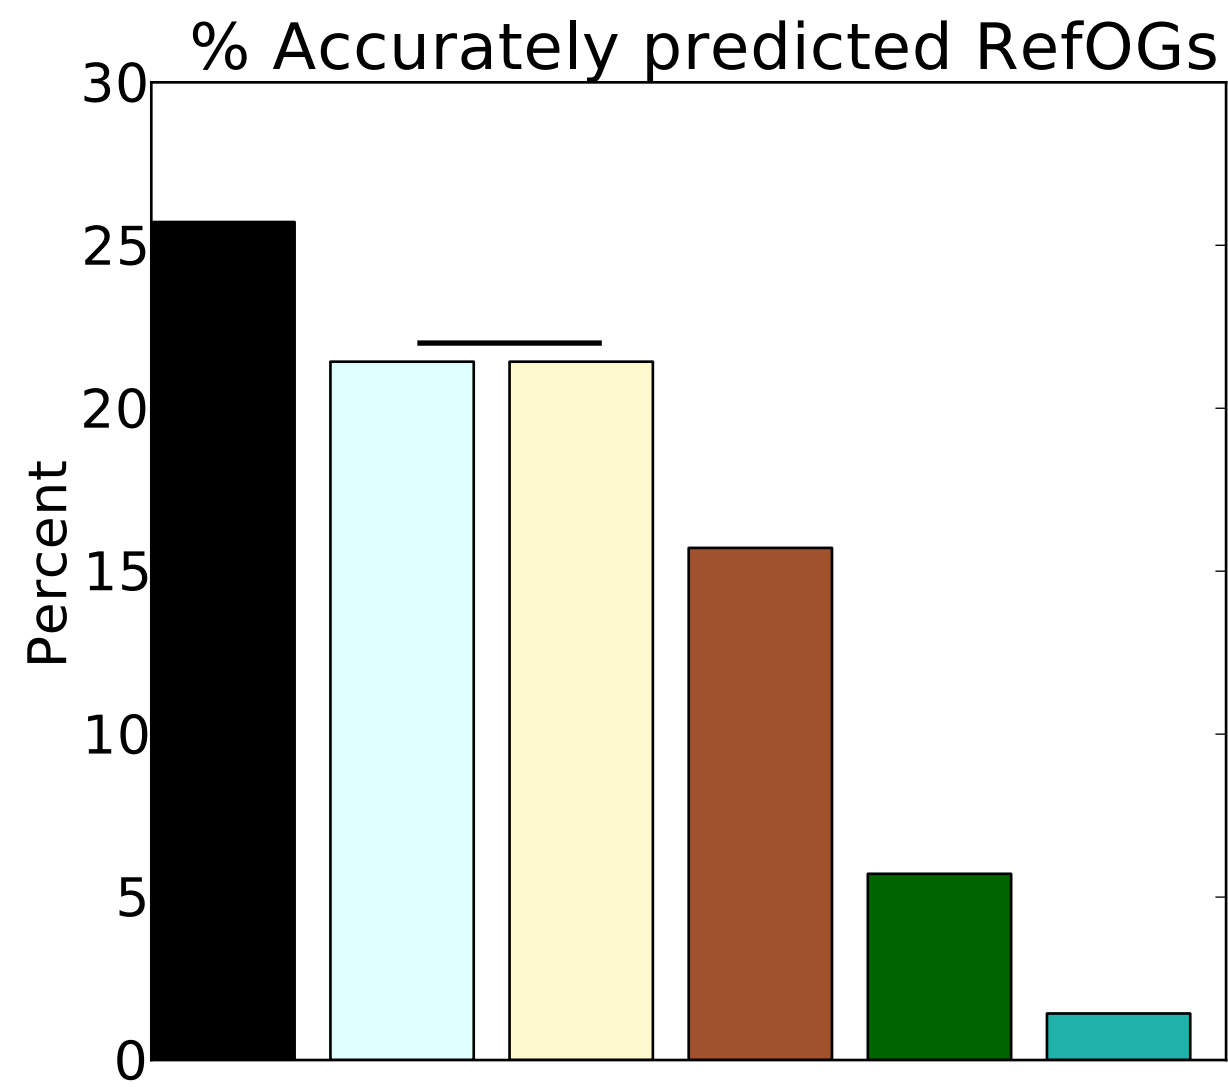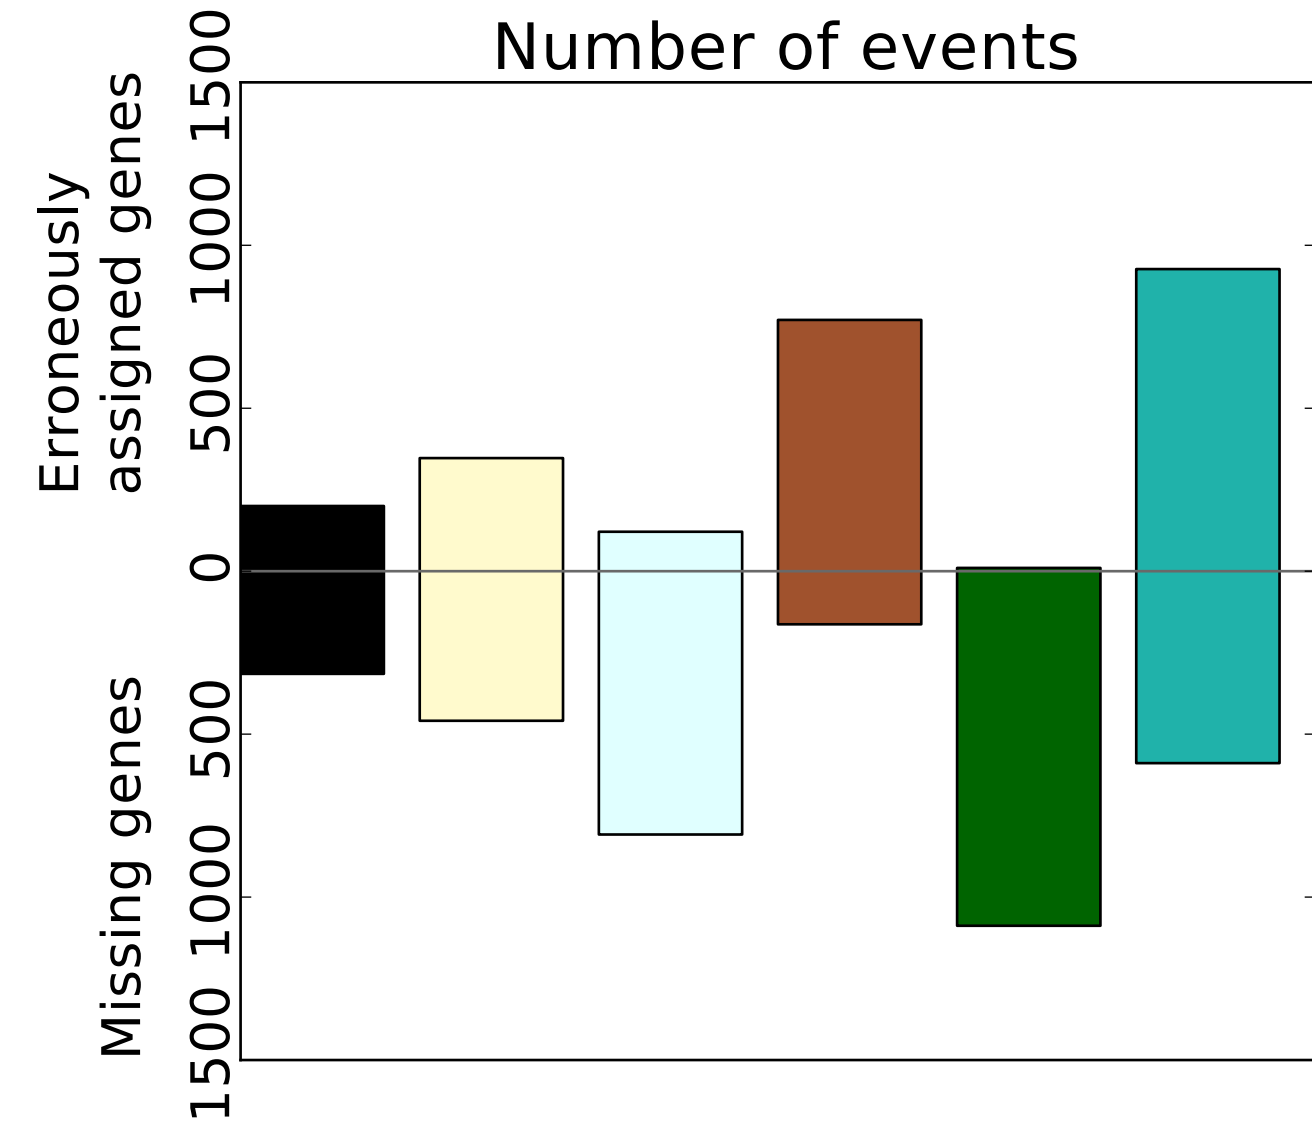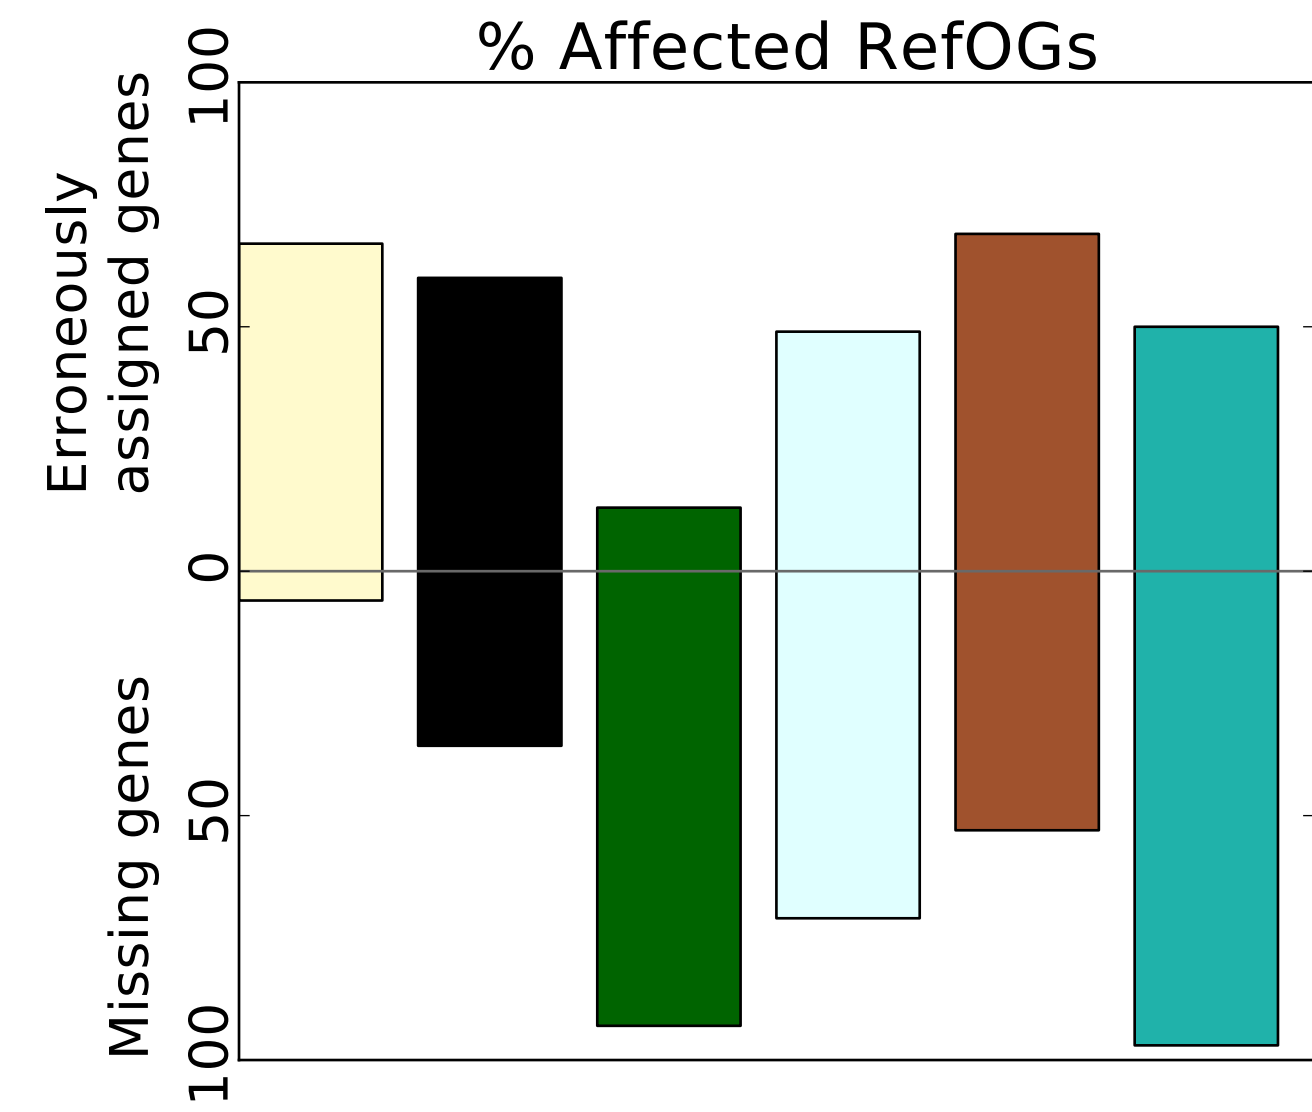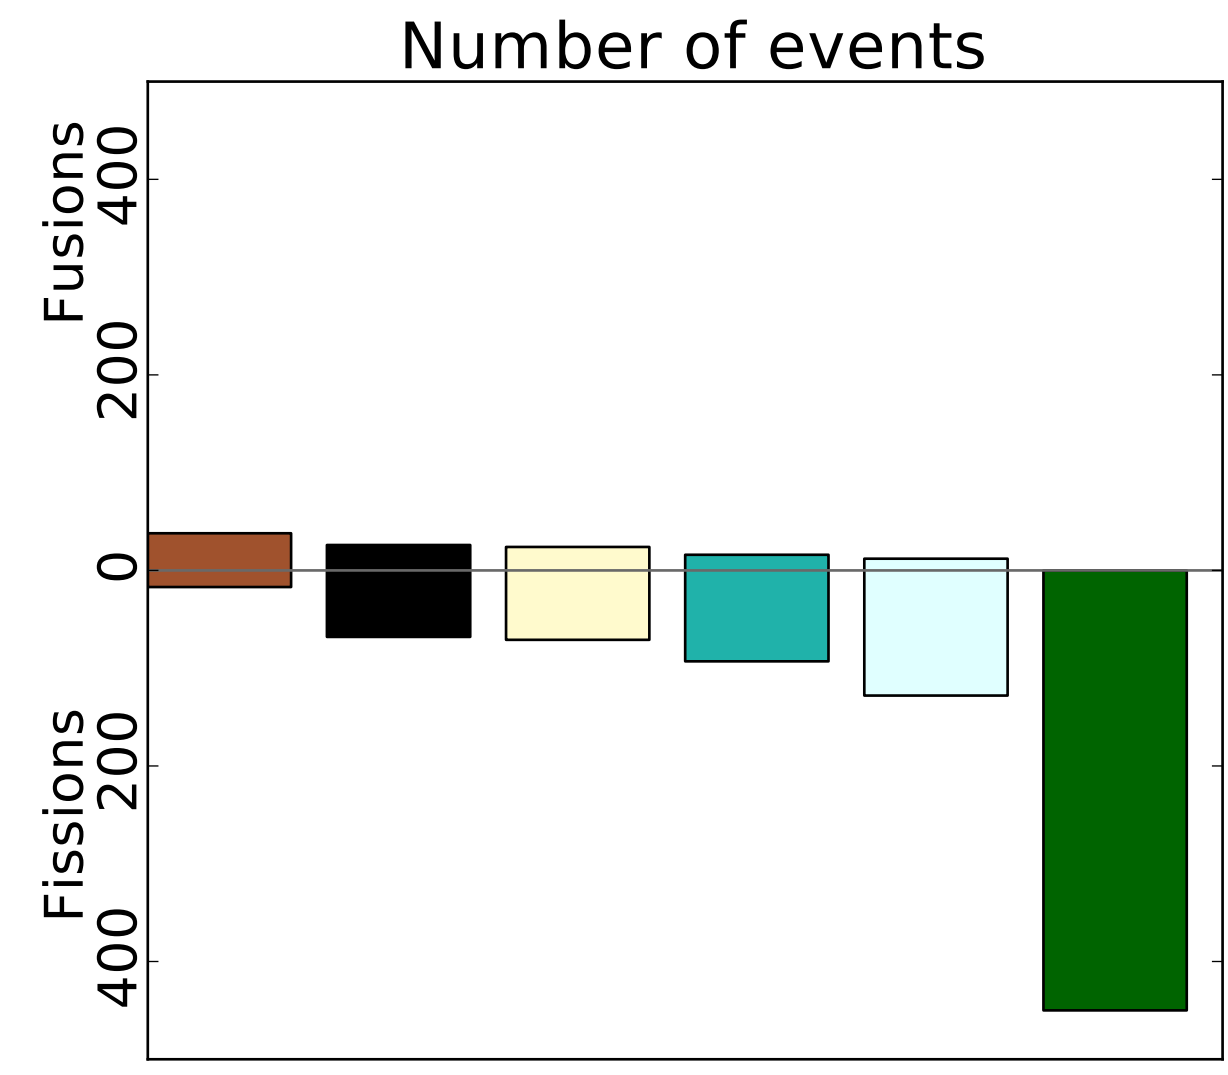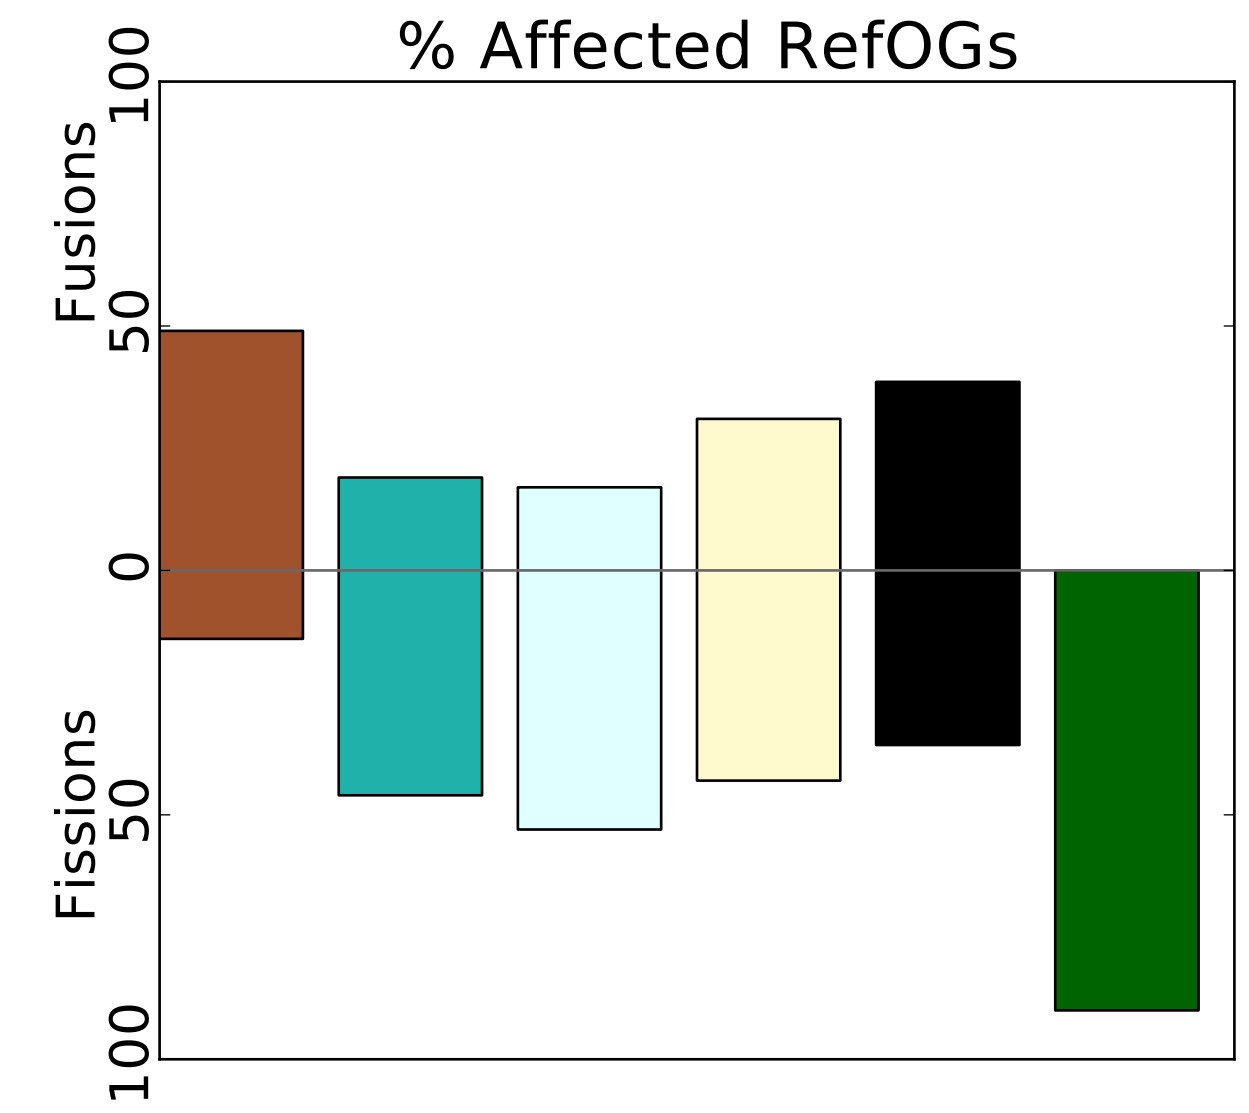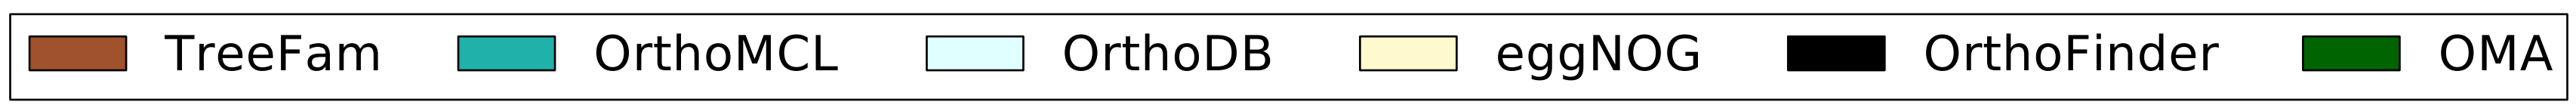

Supplement: 13059_2015_721_MOESM3_ESM.pdf [file 13059_2015_721_MOESM3_ESM.pdf]
