# Supplementary material for: OrthoFinder: solving fundamental biases in whole genome comparisons dramatically improves orthogroup inference accuracy
Source: Springer Nature journal article supplement (doi:10.1186/s13059-015-0721-2), 2015-08-05

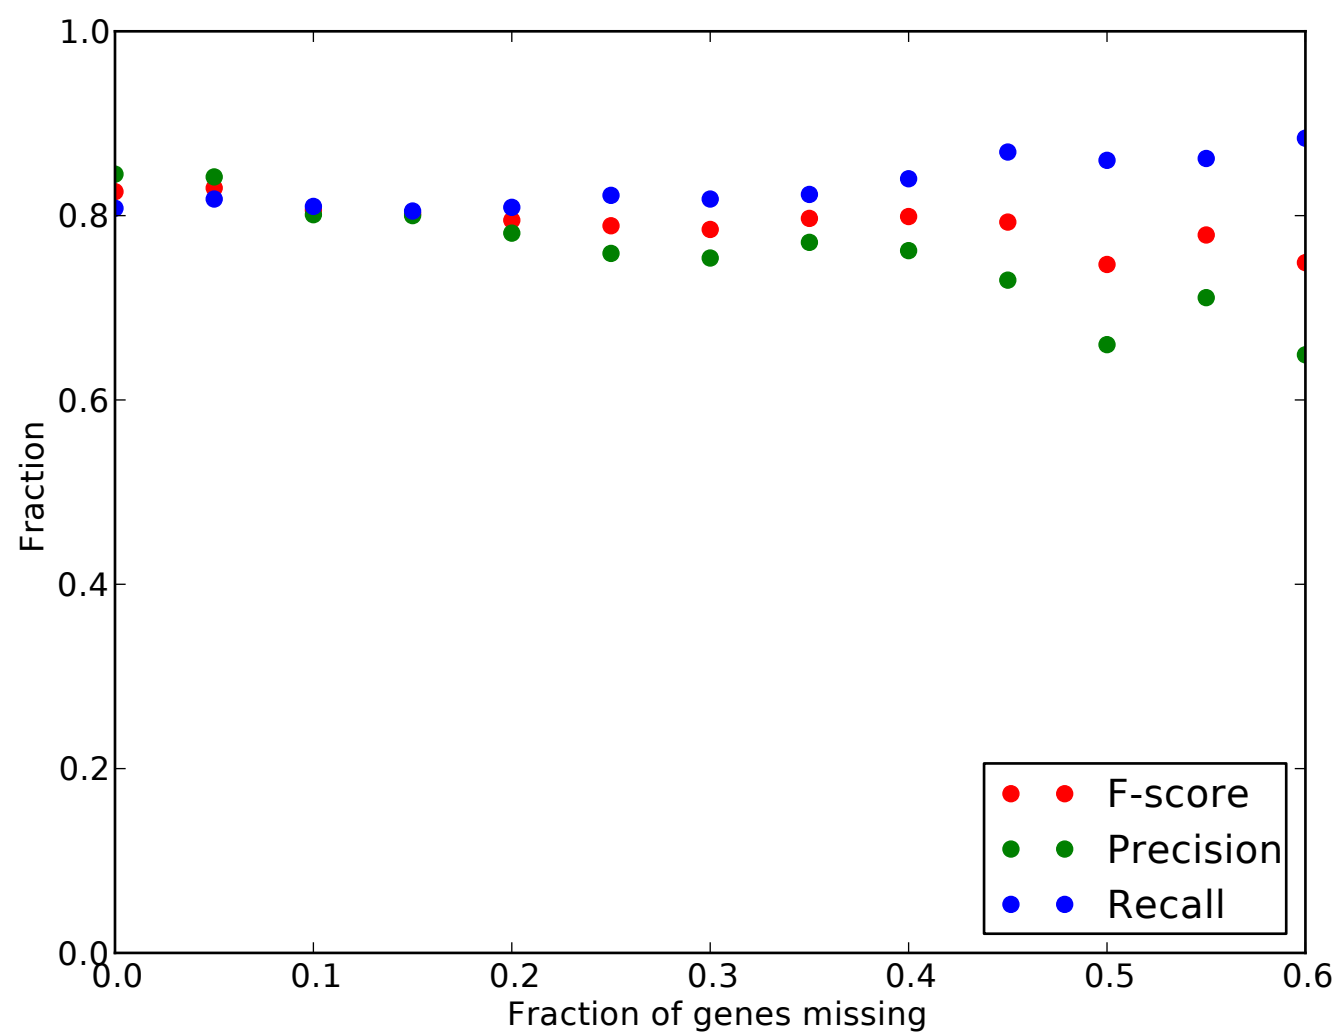

Supplement: 13059_2015_721_MOESM5_ESM.pdf [file 13059_2015_721_MOESM5_ESM.pdf]
